# Supplementary material for: The crystal structure of the Argonaute2 PAZ domain reveals an RNA binding motif in RNAi effector complexes
Source: Springer Nature journal article supplement (doi:10.1038/nsb1016), 2003-11-16
Supplement: 41594_2003_BFnsb1016_MOESM1_ESM.pdf [file 41594_2003_BFnsb1016_MOESM1_ESM.pdf]

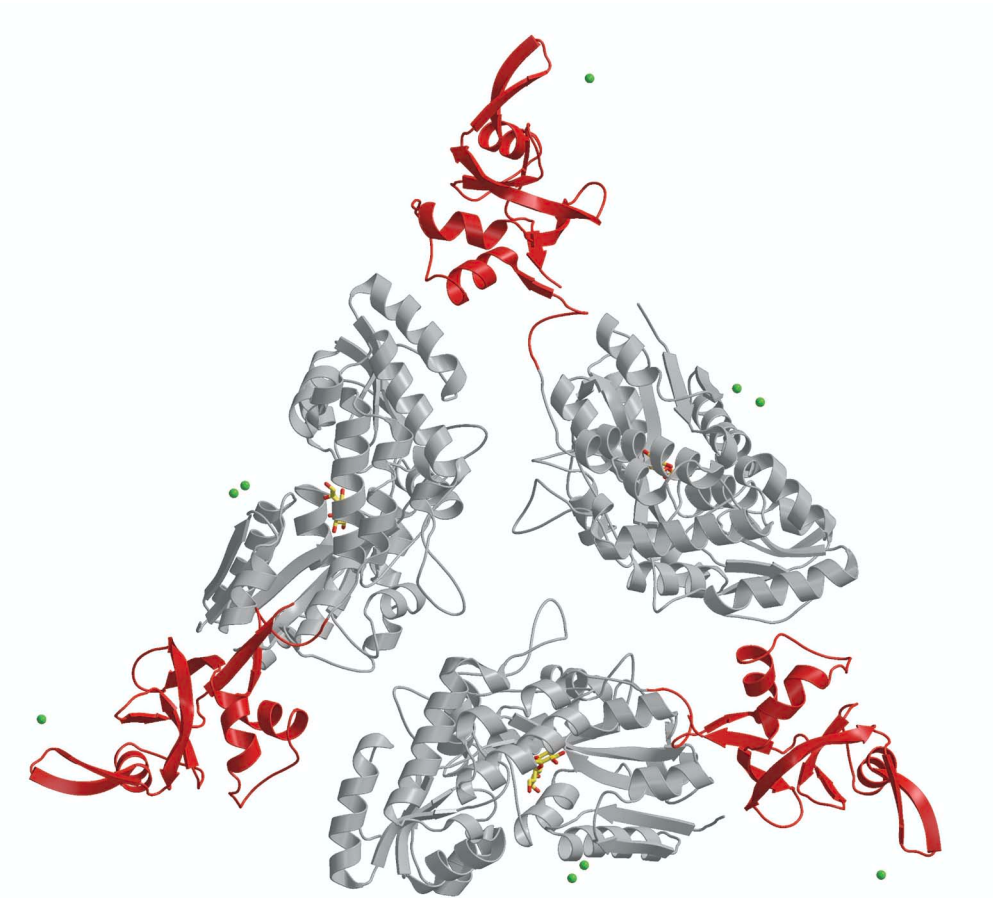

**Supplementary Figure 1** Ribbon diagram of the MBP-PAZ fusion protein crystal structure. Shown are the three molecules in the asymmetric unit, with MBP in gray, Ago2-PAZ in red, the maltose in stick representation and Ni<sup>2+</sup> ions as green spheres. The orientation of the PAZ domain with respect to MBP is different in each molecule.
