# Supplementary material for: The crystal structure of the Argonaute2 PAZ domain reveals an RNA binding motif in RNAi effector complexes
Source: Springer Nature journal article supplement (doi:10.1038/nsb1016), 2003-11-16
Supplement: 41594_2003_BFnsb1016_MOESM2_ESM.pdf [file 41594_2003_BFnsb1016_MOESM2_ESM.pdf]

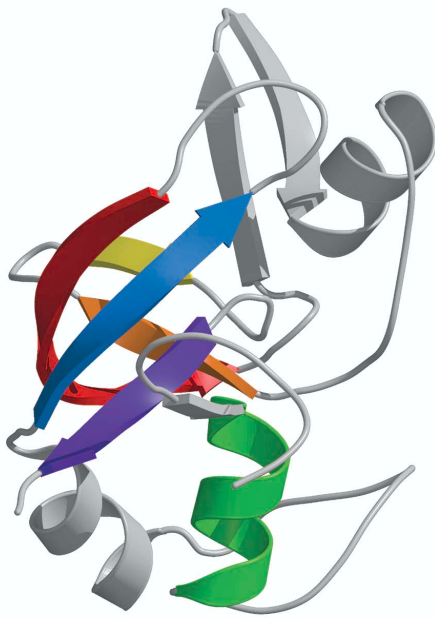

Ago2-PAZ

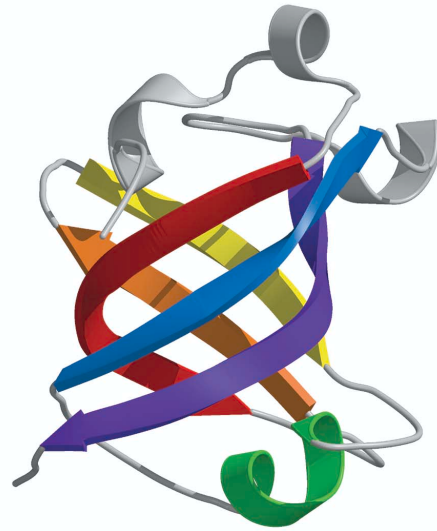

AspRS-OB

**Supplementary Figure 2** Ago2-PAZ has a deviant OB-fold. Ago2-PAZ is shown on the left and the OB-fold domain of aspartyl-tRNA synthetase is shown on the right colored to highlight the similarity in their folds.
